# Supplementary material for: A simple phenazine derivative fluorescence sensor for detecting formaldehyde
Source: Royal Society of Chemistry journal article supplement (doi:10.1039/d2nj02586h), 2022-01-01
Supplement: d2nj02586h1.pdf [file d2nj02586h1.pdf]

## **A Simple Phenazine Derivative Fluorescence Sensor for Detecting Formaldehyde**

*Tai-Bao Wei<sup>a,\*</sup>, Li-Rong Dang<sup>a</sup>, Yu Jia<sup>a</sup>, Jian-Peng Hu<sup>a</sup>, Qi Lin<sup>a</sup>, Hong Yao<sup>a</sup>, Bin-Bin Shi<sup>a</sup>, You-Ming Zhang,<sup>a, b</sup> and Wen-Juan Qu<sup>a,\*</sup>*

*<sup>a</sup> Key Laboratory of Polymer Materials of Gansu Province, Research Center of Gansu Military and Civilian Integration Advanced Structural Materials, College of Chemistry and Chemical Engineering, Northwest Normal University, Anning East Road 967, Lanzhou, Gansu, 730070, P. R. China.*

*<sup>b</sup> Deputy Director-General of Gansu Natural Energy Research Institute, Renmin Road 23, Lanzhou, Gansu.*

Key words: Phenazine, Crystal, Fluorescent detection, VOCs.

Corresponding authors: Pro. Dr. Tai-Bao Wei - [weitaibao@126.com](mailto:weitaibao@126.com)

## Contents

**Scheme S1:** Synthesis of **PHTA**

**Scheme S2:** The reaction mechanism and synthesis route of **PHTA-HCHO** (a) acidic conditions and (b) alkaline conditions.

**Figure S1:**  $^1\text{H}$ -NMR spectrum of 2, 3-diaminophenazine (**DAP**) in  $\text{DMSO}-d_6$ .

**Figure S2:**  $^1\text{H}$ -NMR spectrum of 2-amino-3-hydroxyphenazine (**AHP**) in  $\text{DMSO}-d_6$

**Figure S3:**  $^1\text{H}$ -NMR spectrum of **DAPH** in  $\text{DMSO}-d_6$ .

**Figure S4:**  $^{13}\text{C}$ -NMR spectrum of **DAPH** in  $\text{DMSO}-d_6$ .

**Figure S5:**  $^1\text{H}$ -NMR spectrum of **PHTA** in  $\text{DMSO}-d_6$ .

**Figure S6:**  $^{13}\text{C}$ -NMR spectrum of **PHTA** in  $\text{DMSO}-d_6$ .

**Figure S7:** The ESI/MS of **PHTA**

**Figure S8:** UV absorption spectra of **PHTA** and **PHTA+HCHO**

**Figure S9:** Fluorescence emission spectra of (a):  $n_{\text{HCHO}} = 1\text{mM}$ ; (b):  $n_{\text{HCHO}} = 2\text{mM}$ ; (c):  $n_{\text{HCHO}} = 3\text{mM}$  was added to **PHTA** ( $C = 2.0 \times 10^{-5}$ ); (d) Fluorescence emission scatter diagram with FA added in **PHTA** within 10 min ( $\lambda_{\text{ex}} = 395\text{nm}$ ).

**Figure S10:** Fluorescent intensity change of **PHTA** added to HCHO in different PH systems ( $\lambda_{\text{ex}} = 395\text{nm}$ ).

**Figure S11:** Fluorescence spectra of the target compound **PHTA-HCHO** ( $2.0 \times 10^{-4} \text{ M}$ ) in the DMSO solution in the presence of FA and other VOCs.

**Figure S12:** The fluorescence spectral intensity linear range for FA

**Figure S13.** Energy-minimized structure of chemosensor (a) **PHTA** and (b) **PHTA-HCHO**.

**Figure S14:** (a) Host compound **PHTA** at nature light; (b) After 24h of exposure to formaldehyde gas at nature light; (c) Host compound **PHTA** under UV-lamp ( $\lambda_{\text{ex}} = 365\text{nm}$ ); (d) After 6h of exposure to formaldehyde gas under UV-lamp ( $\lambda_{\text{ex}} = 365\text{nm}$ ); (e) After 24h of exposure to formaldehyde gas under UV-lamp ( $\lambda_{\text{ex}} = 365\text{nm}$ ); (f) After 48h of exposure to formaldehyde gas under UV-lamp ( $\lambda_{\text{ex}} = 365\text{nm}$ )

**Figure S15:** Fluorescence color change (under the UV-lamp,  $\lambda_{\text{ex}} = 365 \text{ nm}$ ) of silica gel plate treated by **PHTA** after addition HCHO .

**Figure S16:** Fluorescence color (under the UV lamp, at  $\lambda_{\text{ex}} = 365 \text{ nm}$ ) of silica gel plate after

addition HCHO (Control experiment with figure S13).

**Figure S17:** Fluorescence color change (under the UV lamp, at  $\lambda_{\text{ex}} = 365 \text{ nm}$ ) of silica gel plate treated by **PTHA** after exposure HCHO and heat.

**Figure S18:** Fluorescence color change (under the UV lamp, at  $\lambda_{\text{ex}} = 365 \text{ nm}$ ) of **PTHA** solution after exposure HCHO and heat.

**Figure S19:** The fluorescence spectrum of **PMTA** ( $C=1.0 \times 10^{-3}$ ) in food ( $\lambda_{\text{ex}} = 395 \text{ nm}$ ).

**Figure S120:** Determination of HCHO content in food.

**Figure S21:** The ESI-MS of **PMTA** in food.

**Table S1:** Comparison of LOD and Response Time of Sensor for HCHO with Previously Reported HCHO Sensors

**Table S2:** Crystal data of **PHTA-HCHO**

Diluted hydrochloric acid (6 mol/L) was added slowly to O-pheny-lenediamine (5.40 g, 50mmol) in round-bottom flask (500 mL). The resulting solution was stirred at room temperature until the o-pheny- lenediamine completely dissolved. 53.0g  $\text{FeCl}_3 \cdot 6\text{H}_2\text{O}$  was dissolved in distilled water (75 mL) and trickled slowly into the round-bottom flask with a constant pressure funnel. With the addition of  $\text{FeCl}_3 \cdot 6\text{H}_2\text{O}$ , a red solid gradually formed. Produced mixture was stirred for 24 h, then removed and filtered, the red solid was washed with 6mol/L diluted hydrochloric acid for 3 to 5 times. Put red solid in hot distilled water at 100 °C and added 75ml NaOH (2 mol/L) into it, then a yellow solid was formed immediately. Continue to stir for 30–35 min and let it stand for 12h, after the suction filtration had tan solid was produced which was 2,3-diaminophenazine (**DAP**) (Yield: 41.5%. m.p > 300 °C). An orange precipitate was formed gradually after the addition of hydrochloric acid to the filtrate drop by drop. Then, adjusted the appropriate pH (pH =4–5) for precipitate and washed with distilled water. The obtained orange-red solid after drying was 2-amino-3-hydroxyphenazine (**AHP**)(Yield: 52.7%. m.p > 300 °C).

### Scheme S1: Synthesis of PHTA

## Crystal culture

**PHTA** (22 mg, 0.1 mmol) dissolved in DMSO, 0.5 formaldehyde solution was added. Sealed and stood for two days to precipitate dark yellow crystals in the container.

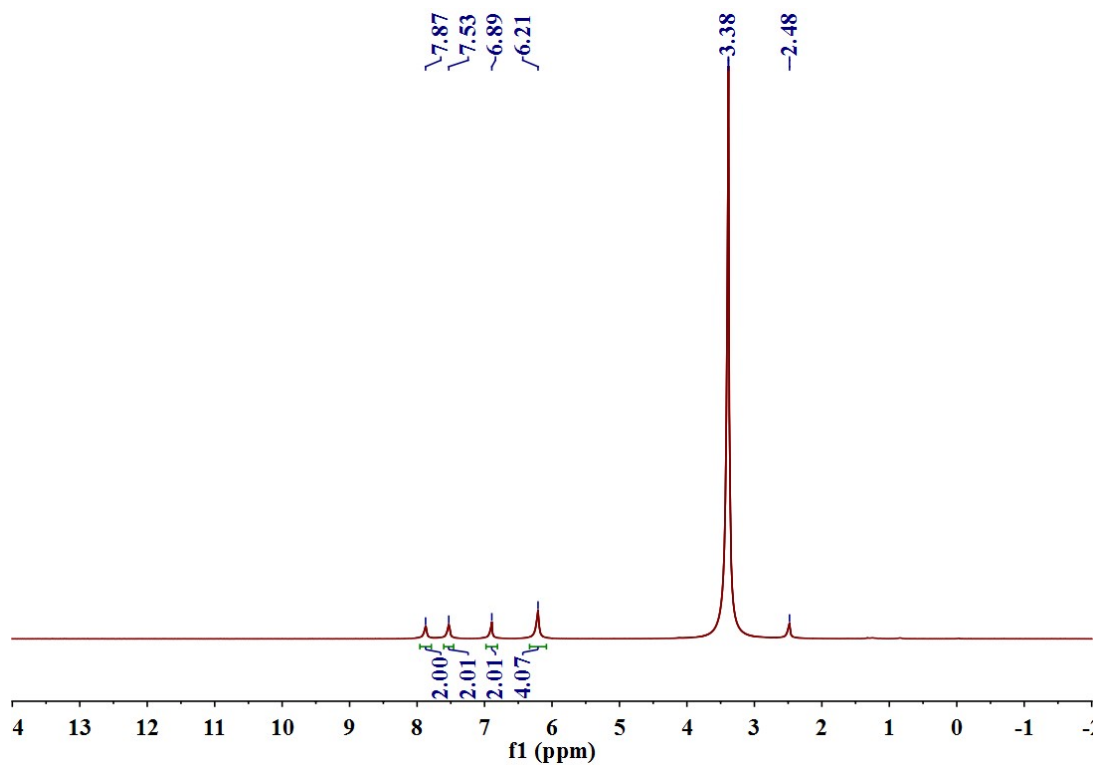

**Figure S1:** <sup>1</sup>H-NMR spectrum of 2, 3-diaminophenazine (**DAP**) in DMSO-*d*<sub>6</sub>.

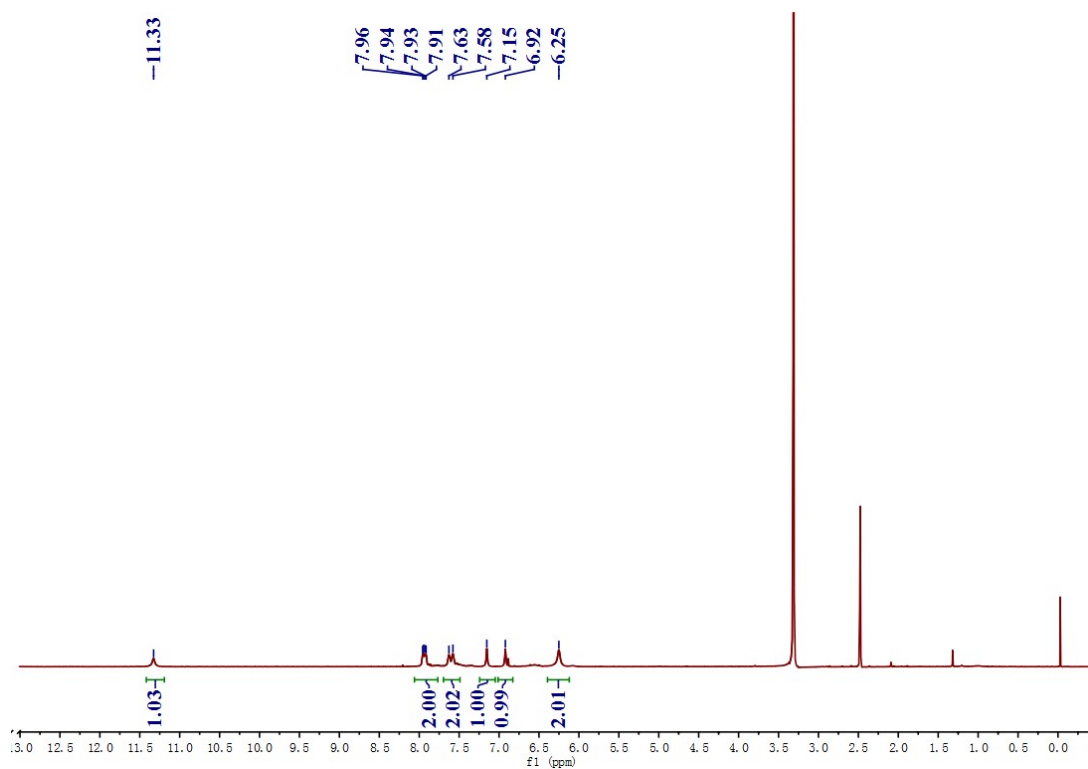

**Figure S2:**  $^1\text{H}$ -NMR spectrum of 2-amino-3-hydroxyphenazine (**AHP**) in  $\text{DMSO}-d_6$

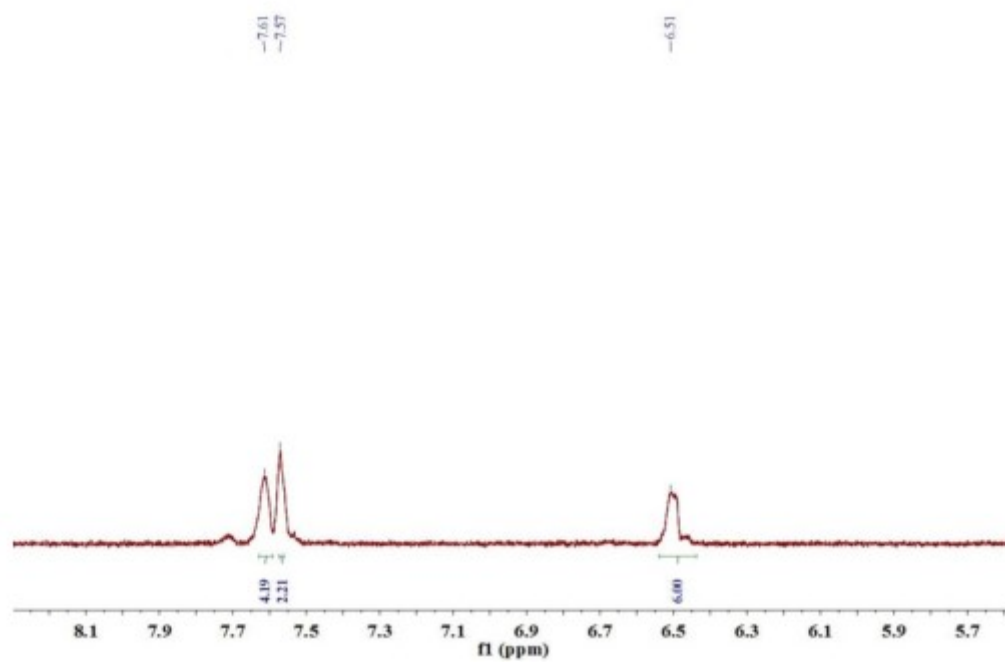

**Figure S3:**  $^1\text{H}$ -NMR spectrum of **DAPH** in  $\text{DMSO}-d_6$ .

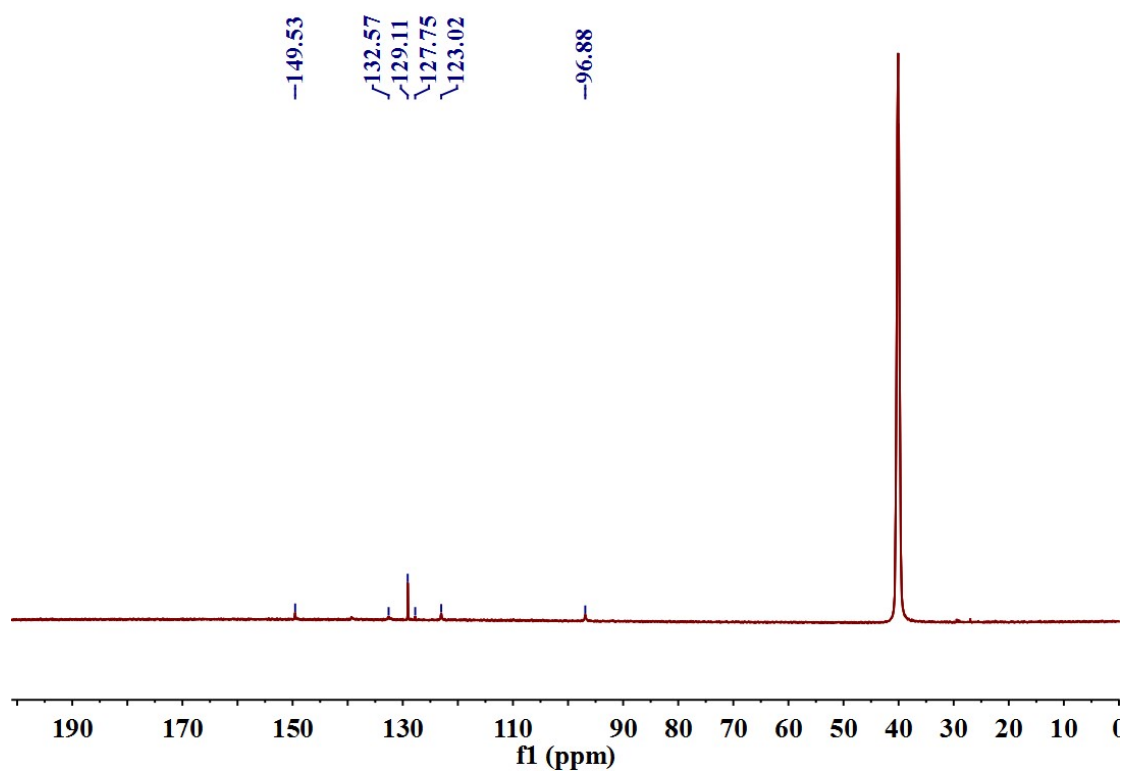

**Figure S4:**  $^{13}\text{C}$ -NMR spectrum of **DAPH** in  $\text{DMSO}-d_6$ .

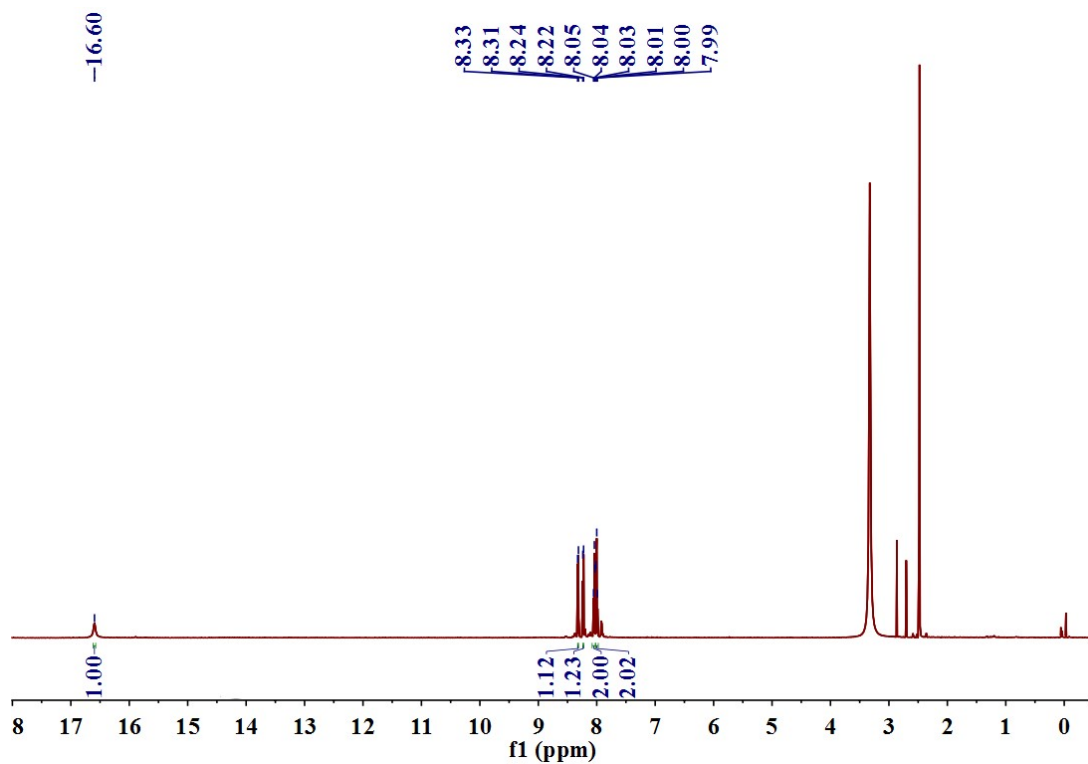

Figure S5: <sup>1</sup>H-NMR spectrum of PHTA in DMSO-*d*<sub>6</sub>.

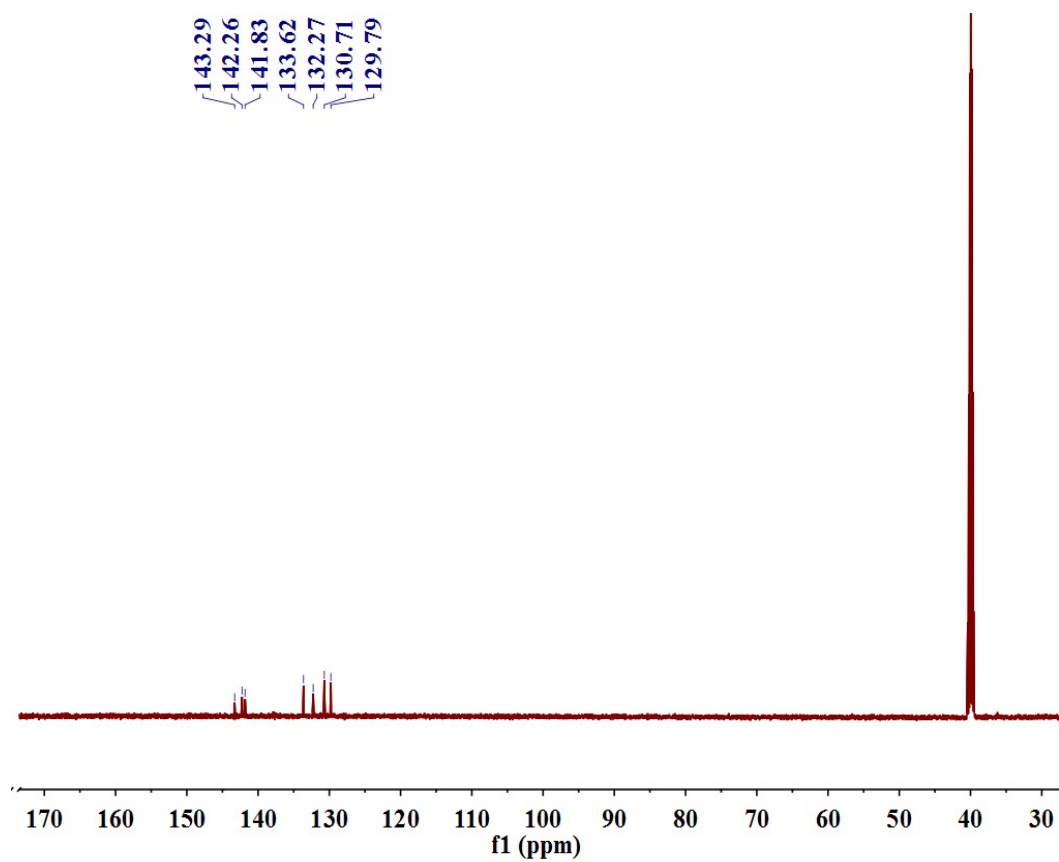

Figure S6: <sup>13</sup>C-NMR spectrum of PHTA in DMSO-*d*<sub>6</sub>.

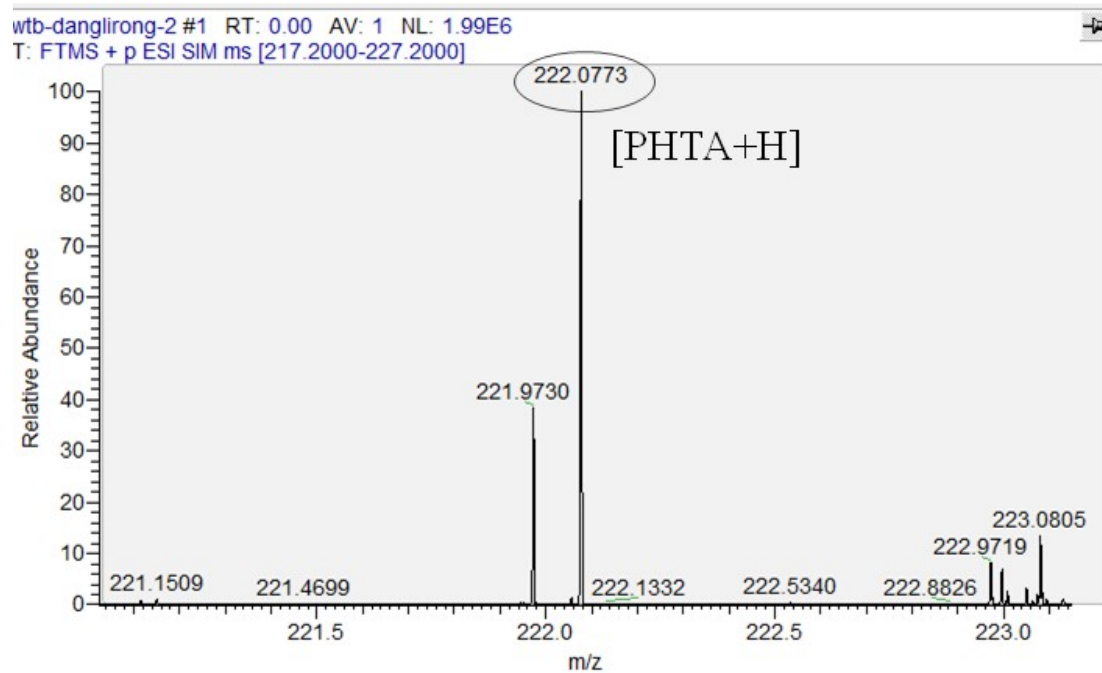

**Figure S7:** The ESI/MS of PHTA.

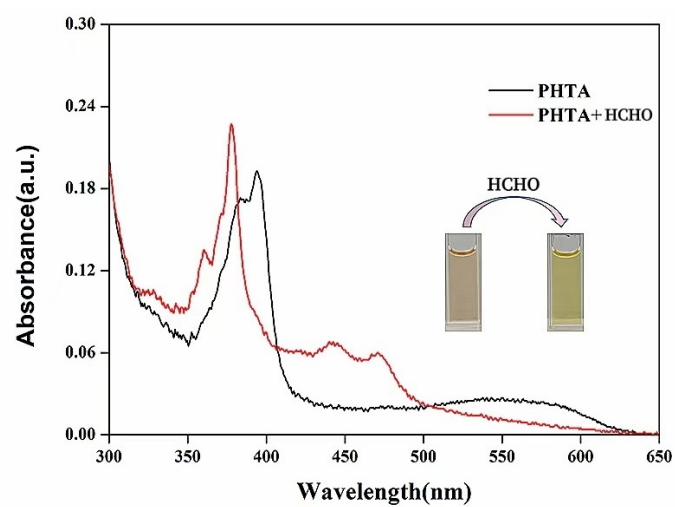

**Figure S8:** UV absorption spectra of PHTA and PHTA+HCHO

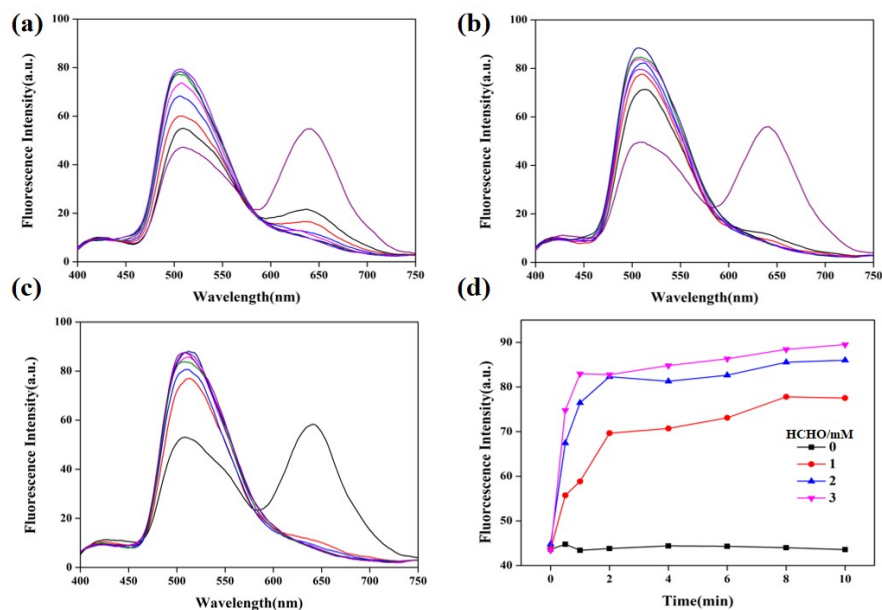

**Figure S9:** Fluorescence emission spectra of (a):  $n_{\text{HCHO}} = 1\text{mM}$ ; (b):  $n_{\text{HCHO}} = 2\text{mM}$ ; (c):  $n_{\text{HCHO}} = 3\text{mM}$  was added to **PHTA** ( $C = 2.0 \times 10^{-5}$ ); (d) Fluorescence emission scatter diagram with HCHO added in **PHTA** within 10 min ( $\lambda_{\text{ex}} = 395\text{nm}$ ).

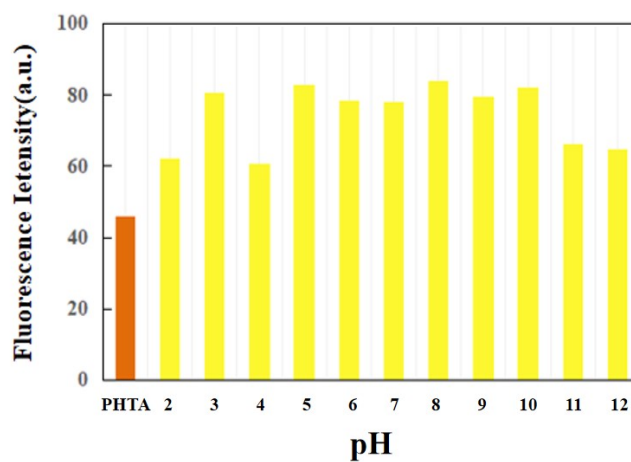

**Figure S10:** Fluorescent intensity change of **PHTA** added to HCHO in different PH systems ( $\lambda_{\text{ex}} = 395\text{nm}$ ).

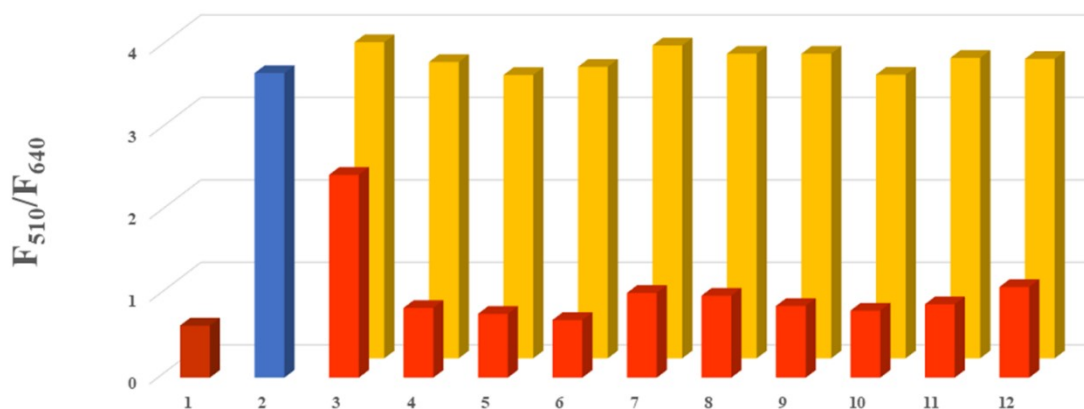

**Figure S11:** Fluorescence spectra of the target compound PHTA-HCHO( $2.0 \times 10^{-4}$  M) in the DMSO solution in the presence of HCHO and other VOCs.

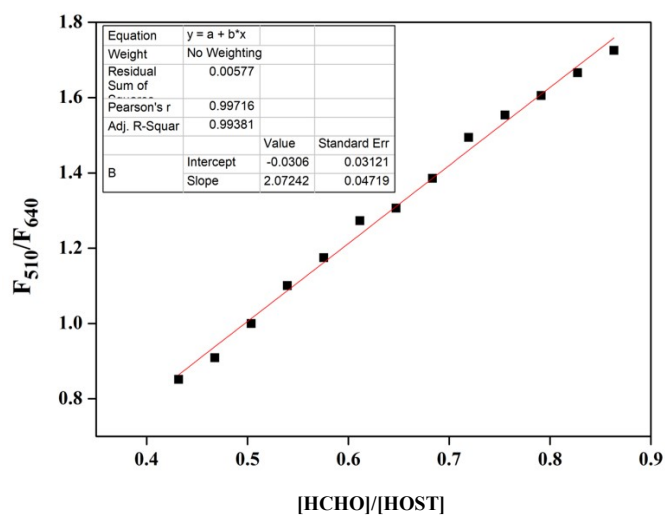

Linear Equation:  $Y = 2.07242X - 0.0306$        $R^2 = 0.99381$

$$S = 2.07242 \times 10^6 \quad \delta = \sqrt{\frac{\sum (F_i - F_0)^2}{N-1}} = 0.010738 \quad (N = 20) \quad K = 3$$

$$\text{LOD} = K \times \delta / S = 1.5544 \times 10^{-8} \text{ M}$$

**Figure S12:** The fluorescence spectral intensity linear range for HCHO

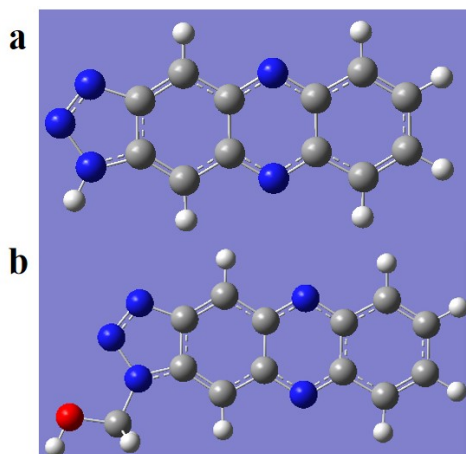

**Figure S13.** Energy-minimized structure of chemosensor (a)**PHTA** and (b)**PHTA-HCHO**.

**(a) Acidic conditions**

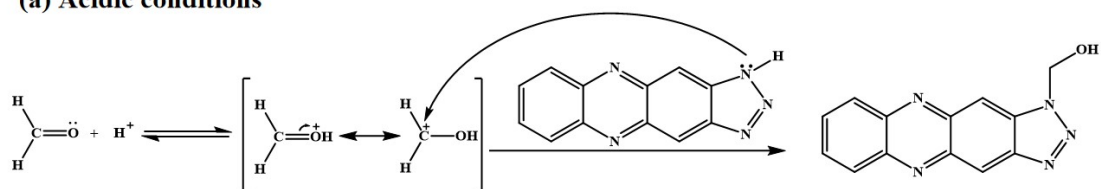

**(b) Alkaline conditions**

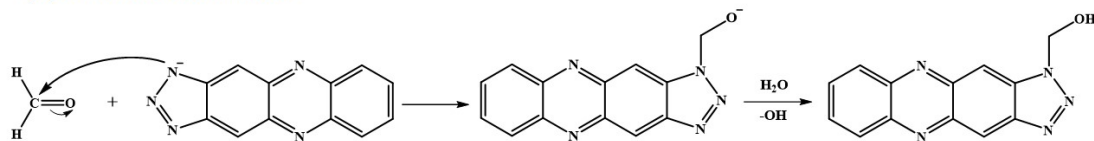

**Scheme S2:** The reaction mechanism and synthesis route of **PHTA-HCHO** (a) acidic conditions and (b) alkaline conditions.

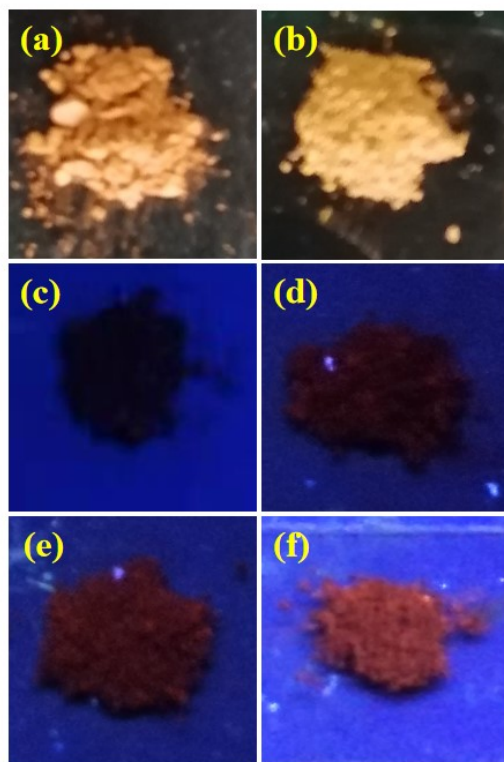

**Figure S14:** (a)Host compound PHTA at nature light; (b)After 24h of exposure to formaldehyde gas at nature light; (c)Host compound PHTA under UV-lamp ( $\lambda_{\text{ex}}=365$  nm); (d)After 6h of exposure to formaldehyde gas under UV-lamp ( $\lambda_{\text{ex}}=365$  nm); (e)After 24h of exposure to formaldehyde gas under UV-lamp( $\lambda_{\text{ex}}=365$  nm); (f)After 48h of exposure to formaldehyde gas under UV-lamp( $\lambda_{\text{ex}}=365$  nm)

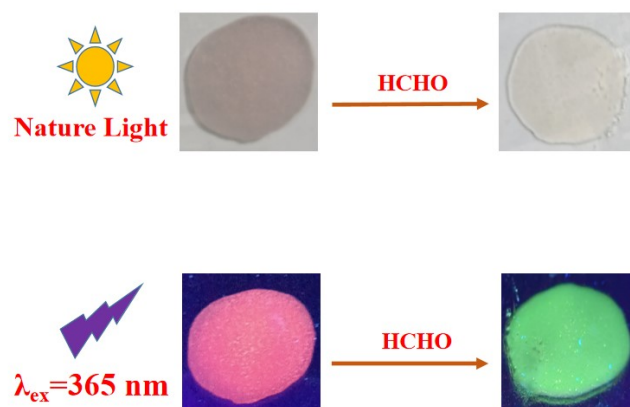

**Figure S15:** Fluorescence color change (under the UV-lamp,  $\lambda_{\text{ex}} = 365$  nm) of silica gel plate treated by **PTHA** after addition HCHO .

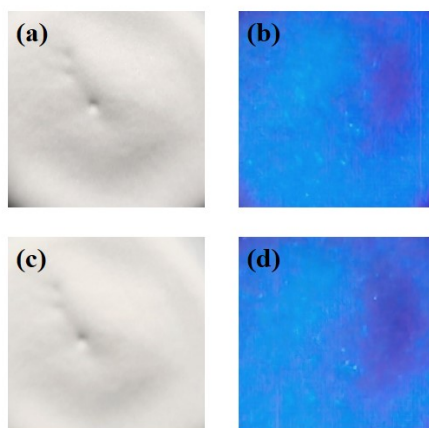

**Figure S16:** Fluorescence color (under the UV lamp, at  $\lambda_{\text{ex}} = 365 \text{ nm}$ ) of silica gel plate after addition HCHO (Control experiment with figure S13).

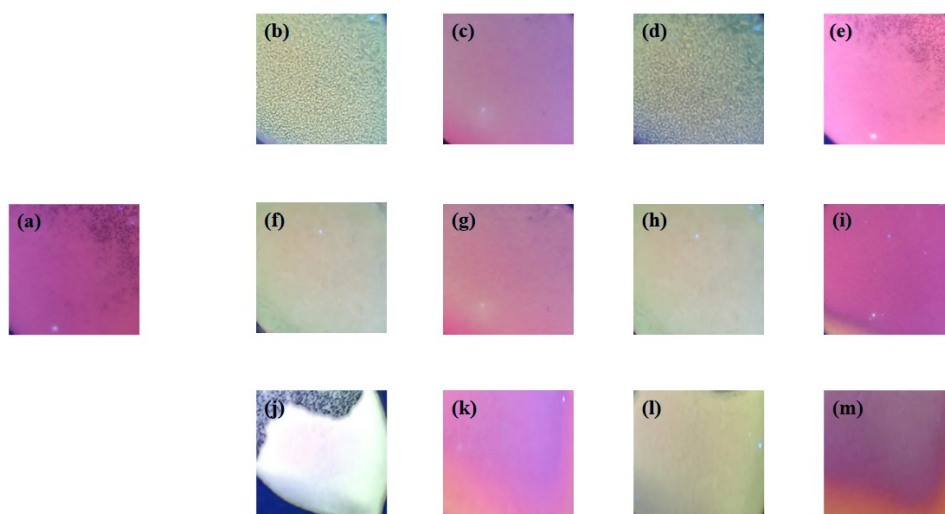

**Figure S17:** Fluorescence color change (under the UV lamp, at  $\lambda_{\text{ex}} = 365 \text{ nm}$ ) of silica gel plate treated by PTHA after exposure HCHO and heat.

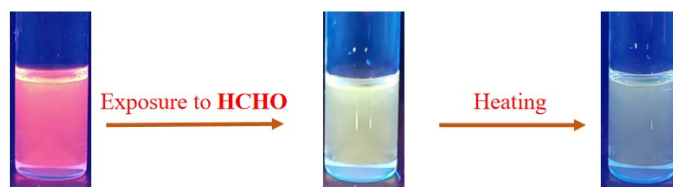

**Figure S18:** Fluorescence color change (under the UV lamp, at  $\lambda_{\text{ex}} = 365 \text{ nm}$ ) of PTHA solution after exposure HCHO and heat.

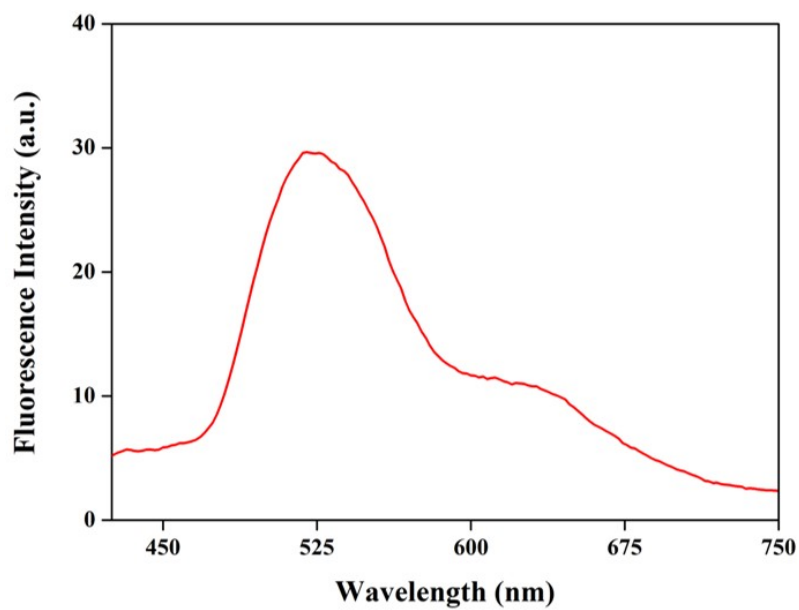

**Figure S19:** The fluorescence spectrum of **PHTA-HCHO** ( $C=1.0 \times 10^{-3}$ ) in food ( $\lambda_{\text{ex}} = 395\text{nm}$ ).

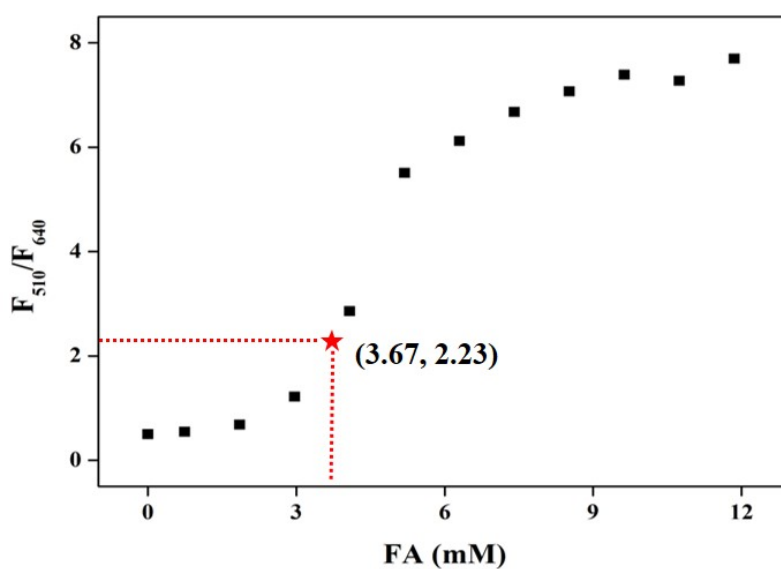

$$N_{\text{PHTA-HCHO}} = 3.67 \text{ mM}$$

$$m_s = 100 \text{ g}$$

$$n_{\text{PHTA-HCHO}}/m_s = 3.67 \times 10^{-5} \text{ M/g}$$

$$m_{\text{PHTA-HCHO}}/m_s = 0.0011 \text{ g/g}$$

**Figure S20:** Determination of HCHO content in food.

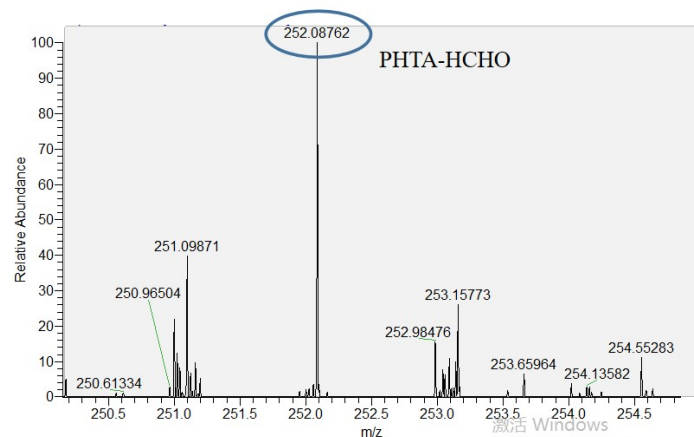

**Figure S21:** The ESI-MS of PHTA-HCHO in food.

**Table S1:** Comparison of LOD and Response Time of Sensor for FA with Previously Reported HCHO Sensors

| Refs     | Response Time | Catalyst | LOD                     |
|----------|---------------|----------|-------------------------|
| 1        | 60 min        | No       | 0.036 mg/m <sup>3</sup> |
| 2        | 90 min        | Yes      | 0.96 μM                 |
| 3        | 300 s         | No       | 0.25 ppm                |
| 4        | -             | Yes      | 19.8 nM                 |
| 5        | 90 s          | Yes      | -                       |
| 6        | 7.5 s         | Yes      | $3.27 \times 10^{-9}$ M |
| 7        | 46 s          | Yes      | $6.67 \times 10^{-7}$ M |
| 8        | -             | No       | $7.7 \times 10^{-7}$ M  |
| Our work | 5 min         | No       | $1.55 \times 10^{-8}$ M |

**Table S2:** Crystal data of PMTA-HCHO

| Compound                              | PHTA-HCHO                                       |
|---------------------------------------|-------------------------------------------------|
| Structural formula                    | C <sub>13</sub> H <sub>9</sub> N <sub>5</sub> O |
| Molecular mass (g mol <sup>-1</sup> ) | 251.250                                         |
| Data collection temp. (K)             | 293K                                            |
| Crystal colour                        | clear dark yellow                               |
| Crystal system                        | triclinic                                       |
| Space group                           | P -1                                            |
| Hall group                            | -P 1                                            |

|                                                     |                                                 |
|-----------------------------------------------------|-------------------------------------------------|
| a (Å)                                               | 6.1526(7)                                       |
| b (Å)                                               | 7,2932(8)                                       |
| c (Å)                                               | 12.3335(16)                                     |
| a (°)                                               | 88.687(10)                                      |
| b (°)                                               | 82.045(10)                                      |
| g (°)                                               | 84.959(9)                                       |
| Volume (Å <sup>3</sup> )                            | 546.27(11)                                      |
| Crystal F 000                                       | 260.0                                           |
| Z                                                   | 2                                               |
| D <sub>c</sub> , calc density (g cm <sup>-3</sup> ) | 1.528                                           |
| Absorption coefficient (mm <sup>-1</sup> )          | 0.858                                           |
| θrange                                              | 10.1520-69.2970                                 |
| Reflections collected                               | 2024                                            |
| No data I > 2 sigma (I)                             | 1562                                            |
| Final R indices [I > 2 sigma (I)]                   | R <sub>1</sub> =0.0426; wR <sub>2</sub> =0,1122 |
| R indices (all data)                                | R <sub>1</sub> =0.0551; wR <sub>2</sub> =0,1250 |
| CCDC                                                | 2041062                                         |

## Notes and references

1. X. J. Zhao, C. D. Ji, L. Ma, Z. Wu, W. Y. Cheng, and M. Z. Yin, *ACS Sens.* 2018, **3**, 2112-2117
2. C. D. Ji, L. Ma, H. T. Chen, Y. Cai, X. J. Zhao, and M. Z. Yin, *ACS Appl. Bio Mater.* 2019, **2**, 555-561
3. B. L. Dong, X. Z. Song, Y. H. Tang, W. Y. Lin, *Sensors and Actuators B*, 2016, **222**, 325-330
4. C. L. Liu, R. Zhang, W. Z. Zhang, J. P. Liu, Y. L. Wang, Z. B. Du, B. Song, Z. P. Xu, and J. L. Yuan, *J. Am. Chem. Soc.*, 2019, **141**, 8462-8472
5. X. X. Sun, H. Zhang, S. Hao, J. F. Zhai, and S. J. Dong, *ACS Sens.*, 2019, **4**, 2631-2637
6. Q. Lin, Y. Q. Fan, G. F. Gong, P. P. Mao, J. Wang, X. W. Guan, J. Liu, Y. M.

- Zhang, H. Yao, and T. B. Wei, *ACS Sustainable Chem. Eng.*, 2018, **6**, 8775-8781
7. Z. Bo, M. Yuan, S. Mao, X. Chen, J. H. Yan, K. F. Cen, *Sens. Actuators, B.*, 2018, **256**, 1011-1020
  8. L. W. He, X. L. Yang, M. G. Ren, X. Q. Kong, Y. Liu, W. Y. Lin, *Chem. Commun.* 2016, **52**, 9582-9585.
